# Supplementary material for: Pupylation-Based Proximity-Tagging of FERONIA-Interacting Proteins in Arabidopsis
Source: PubMed Central journal article supplement (PMC11532908; doi:10.1016/j.mcpro.2024.100828), 2024-08-13
Supplement: mmc17.pdf [file mmc17.pdf]

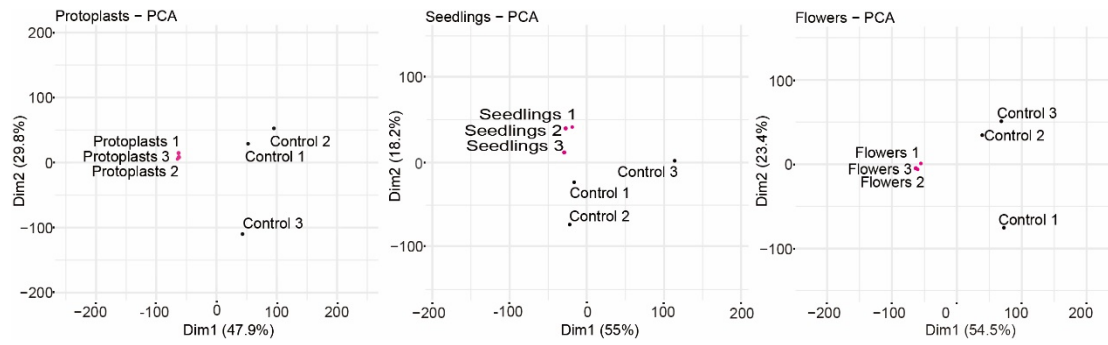

**Fig.S1. PCA analysis of MS data from protoplasts, seedlings and flowers**  
 The PCA analysis of proteins identified in experimental group and control group.
