# Supplementary material for: Pupylation-Based Proximity-Tagging of FERONIA-Interacting Proteins in Arabidopsis
Source: PubMed Central journal article supplement (PMC11532908; doi:10.1016/j.mcpro.2024.100828), 2024-08-13
Supplement: mmc19.pdf [file mmc19.pdf]

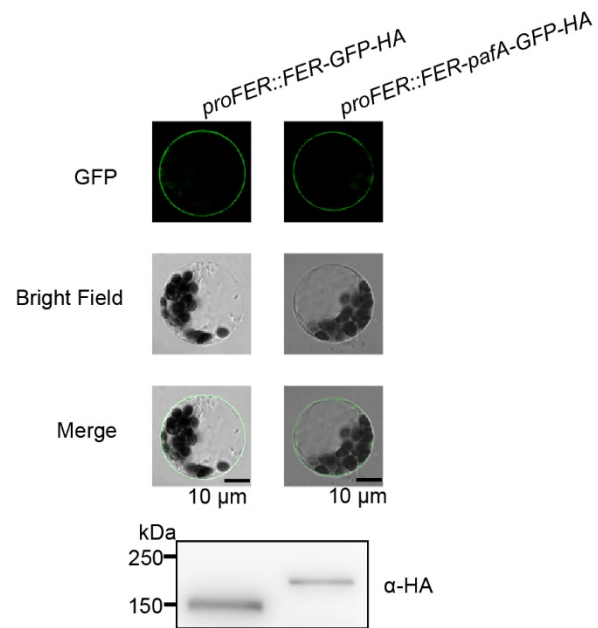

**Fig.S3. Expression and subcellular location of FER-GFP-HA and FER-pafA-GFP-HA.** Fluorescent signal accumulated at the plasma membrane of Arabidopsis mesophyll protoplast expressing *FER-GFP-HA* or *FER-pafA-GFP-HA* using the native promoter sequence of *FER*.  $\alpha$ -HA antibody detected bands with gel mobility consistent with the expected molecular weight of *FER-GFP-HA* (126.7 kDa) and *FER-pafA-GFP-HA* (181.8 kDa).
