# Supplementary material for: Pupylation-Based Proximity-Tagging of FERONIA-Interacting Proteins in Arabidopsis
Source: PubMed Central journal article supplement (PMC11532908; doi:10.1016/j.mcpro.2024.100828), 2024-08-13
Supplement: mmc21.pdf [file mmc21.pdf]

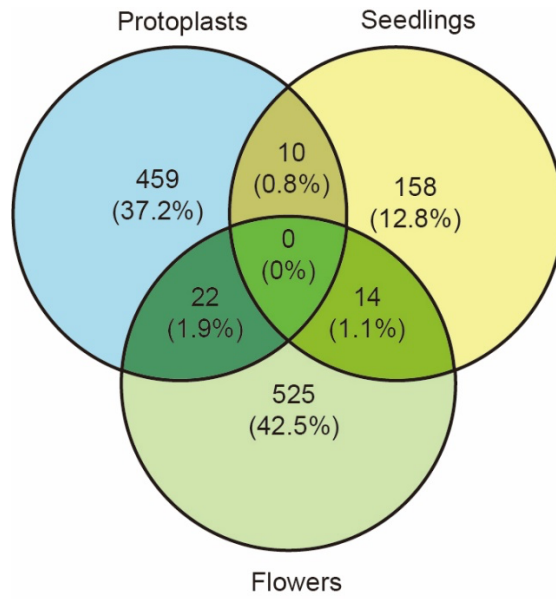

**Fig.S5. Venn diagram of the overlap of three experimental groups.**

The overlap of three experimental groups (protoplasts, seedlings and flowers) of candidate proteins from three replicated experiments is depicted in a Venn diagram with numbers and percentages of proteins.
